# Supplementary material for: Unveiling the Role of Anoikis Resistance in Lung Squamous Cell Carcinoma: A Prognostic Model and Immune Microenvironment Insights
Source: Research Square preprint supplement (doi:10.21203/rs.3.rs-6650097/v1), 2025-05-15
Supplement: Supplementary file 1 [file eeb11abf484371be1f876177.docx]

**Supplementary Information**

*Journal of Cancer Research and Clinical Oncology*

**Unveiling the Role of Anoikis Resistance in Lung Squamous Cell Carcinoma: A Prognostic Model and Immune Microenvironment Insights**

Dong Ou1,2, HongPing Wang3, Yi Liu4, Jin Nie5, Daishun Liu1,6*

1Medical College of Soochow University, Suzhou 215000, China

2Department of Oncology, the Third Affiliated Hospital of Zunyi Medical University (the First People's Hospital of Zunyi), Zunyi 563000, China

3Bishan Hospital of Chongqing, Bishan hospital of Chongqing Medical University, Chongqing 402760, China

4Pulmonary and Critical Care Medicine. Xi Shui County People's Hospital, Guizhou, Zunyi 564600, China

5Pulmonary and Critical Care Medicine, Affiliated Hospital of Zunyi Medical University, Zunyi, Guizhou 563000, China

6Zunyi Medical University, Zunyi 563000, China

***Corresponding author**: Daishun Liu

Email: [ldslwtg@126.com](mailto:ldslwtg@126.com)


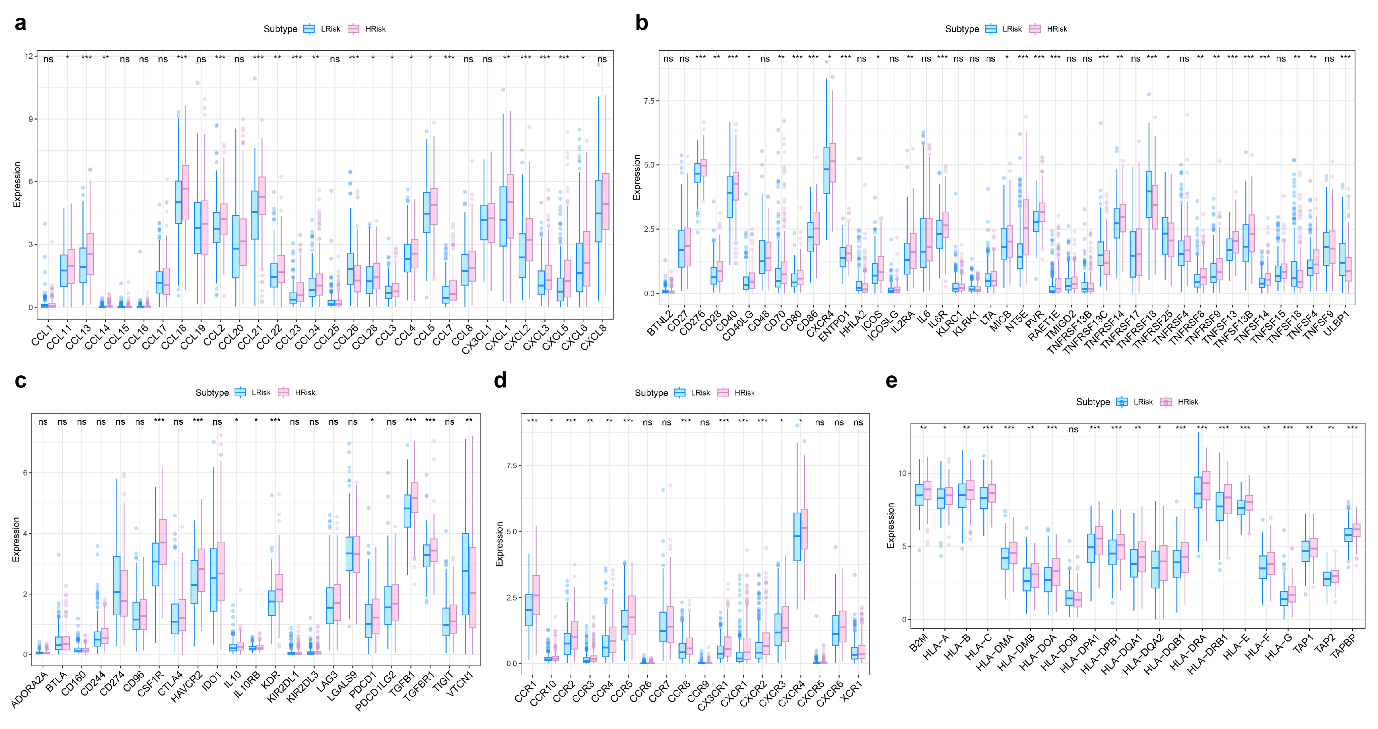


**Supplementary Fig. S1** Differences in immunoregulatory genes between the high- and low-risk groups

(a) Immunosuppressive factors, (b) Immunostimulatory factors, (c) Chemokines, (d) Chemokine receptors, and (e) Immune regulatory factors
